# Supplementary material
Source: PubMed Central journal article supplement (PMC4344873)
Supplement: NIHMS651360-supplement-2.pdf [file NIHMS651360-supplement-2.pdf]

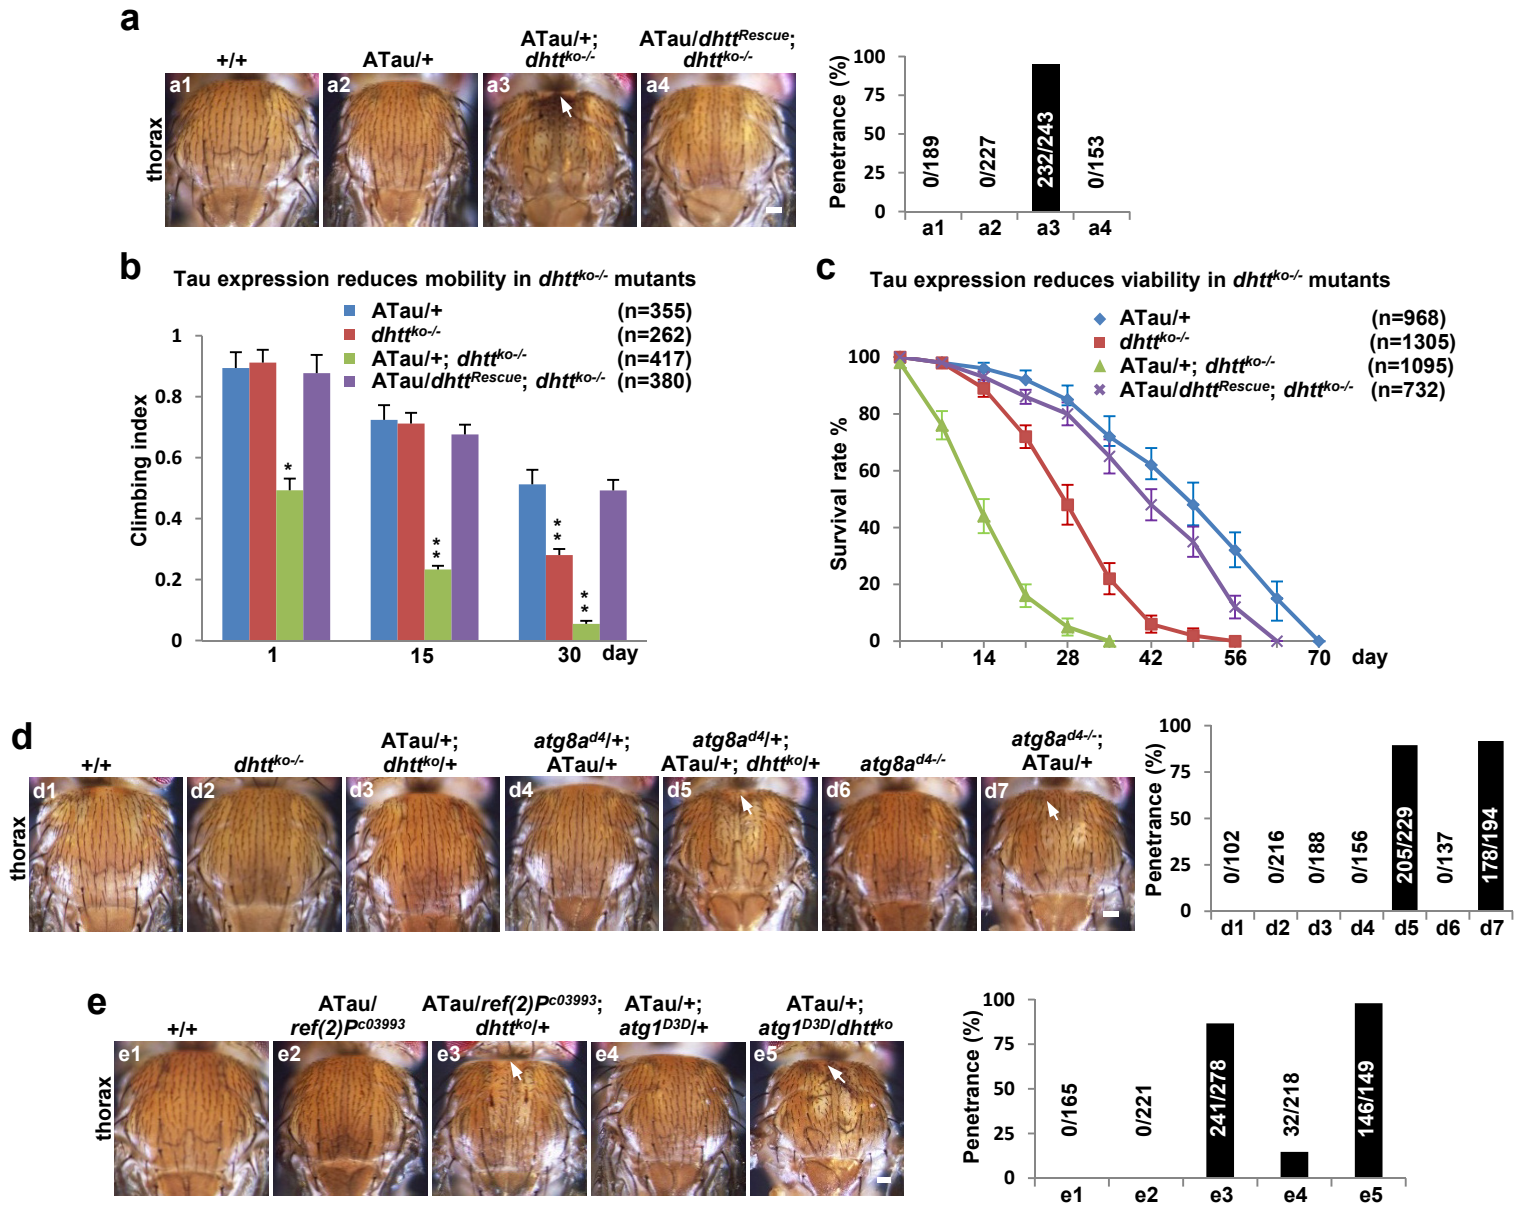

Supplementary Figure 1

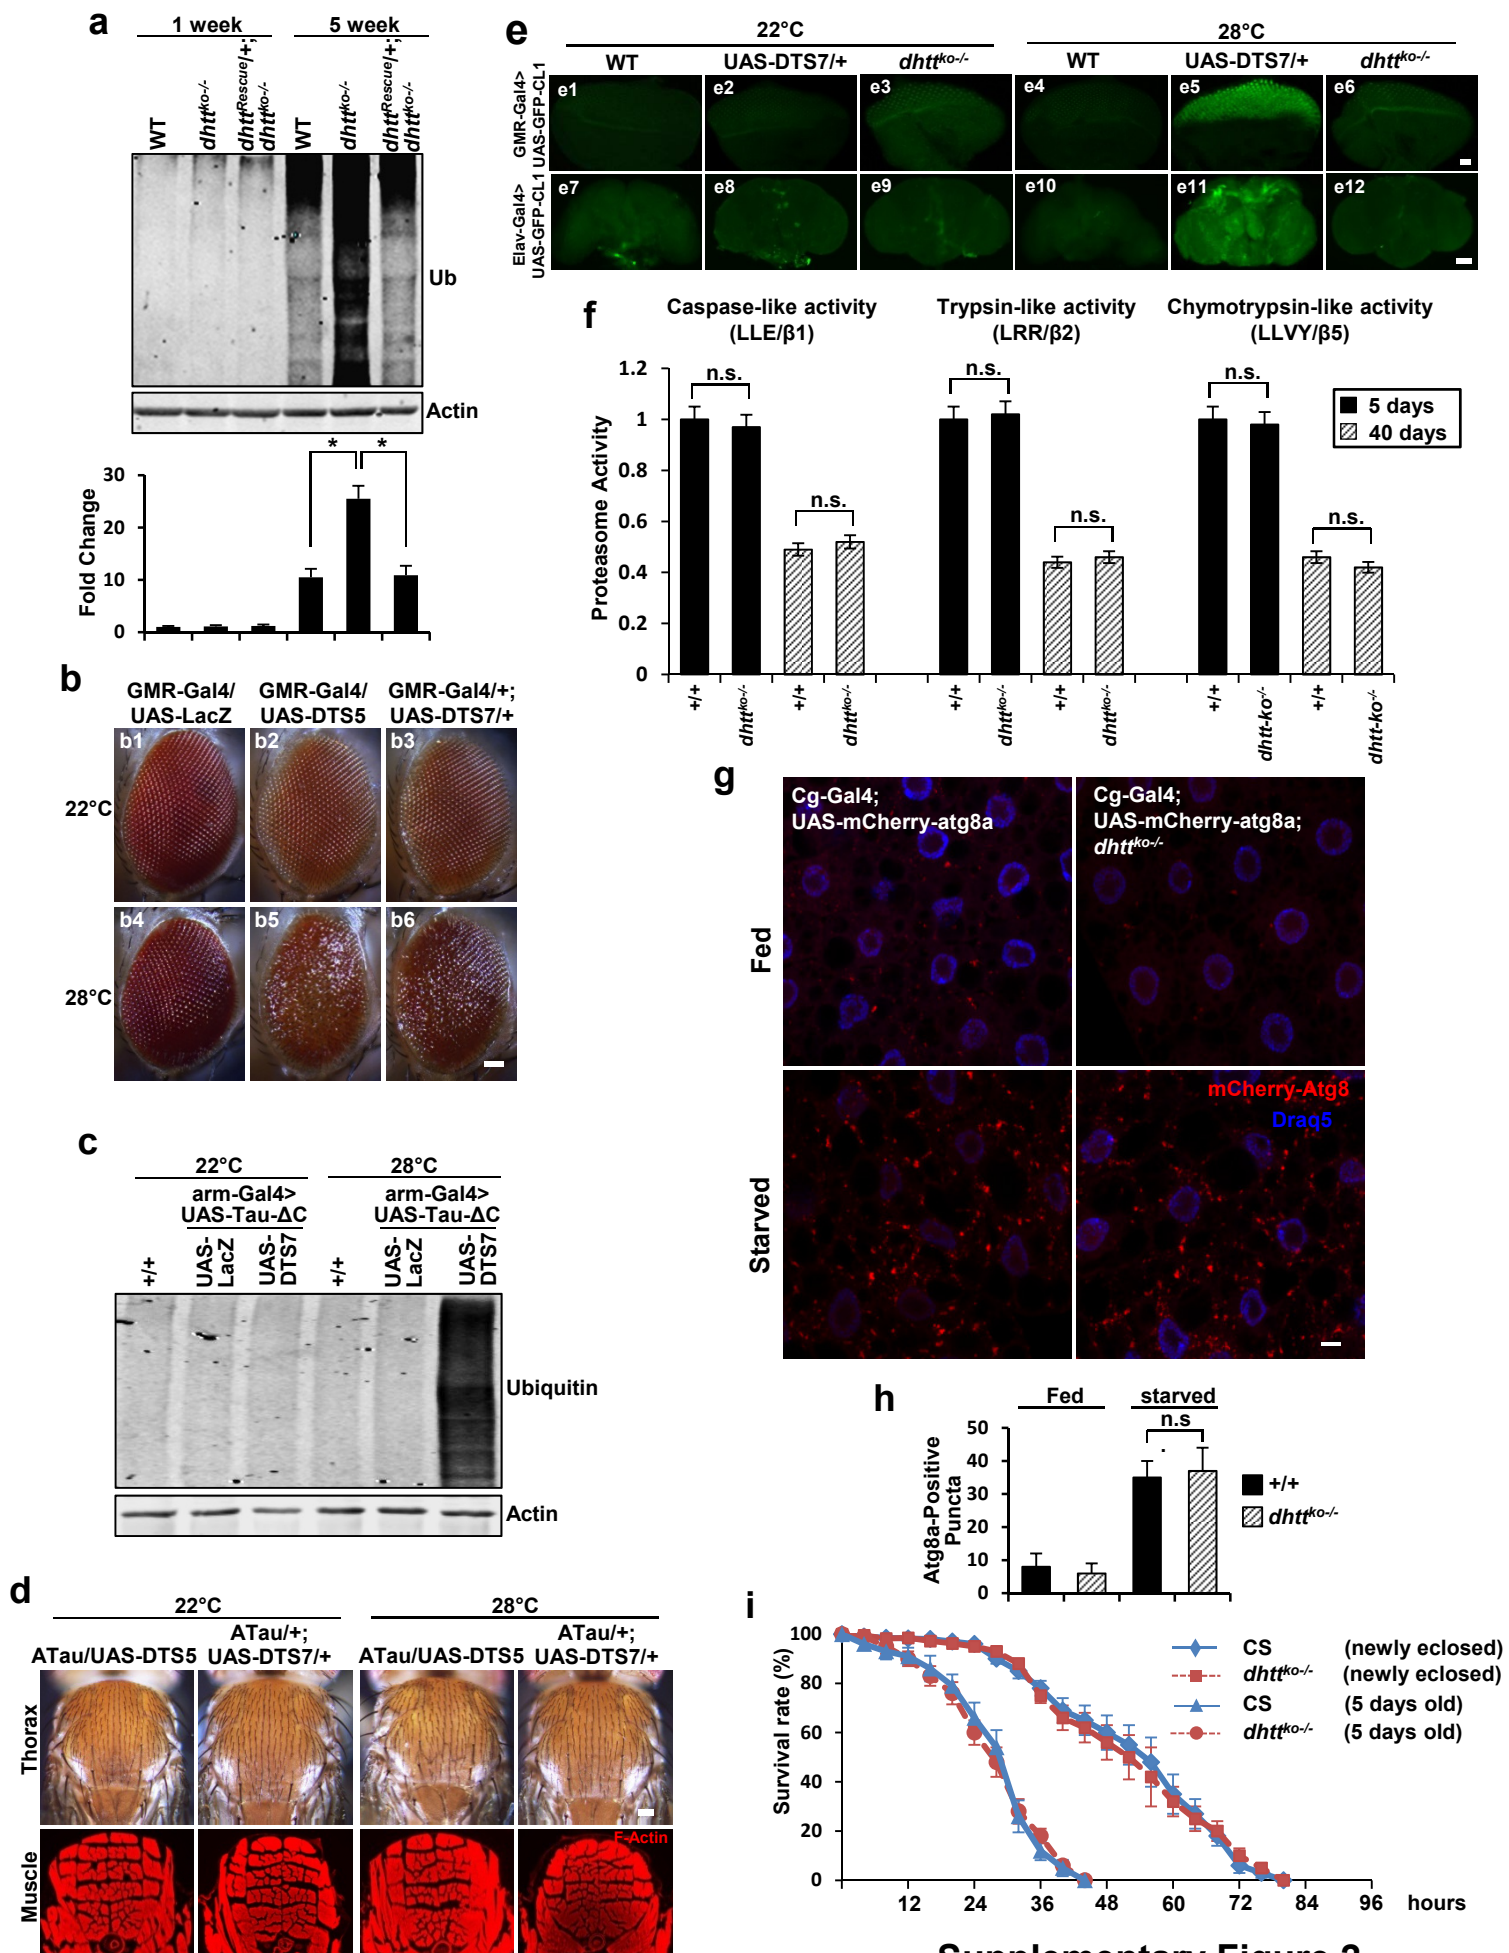

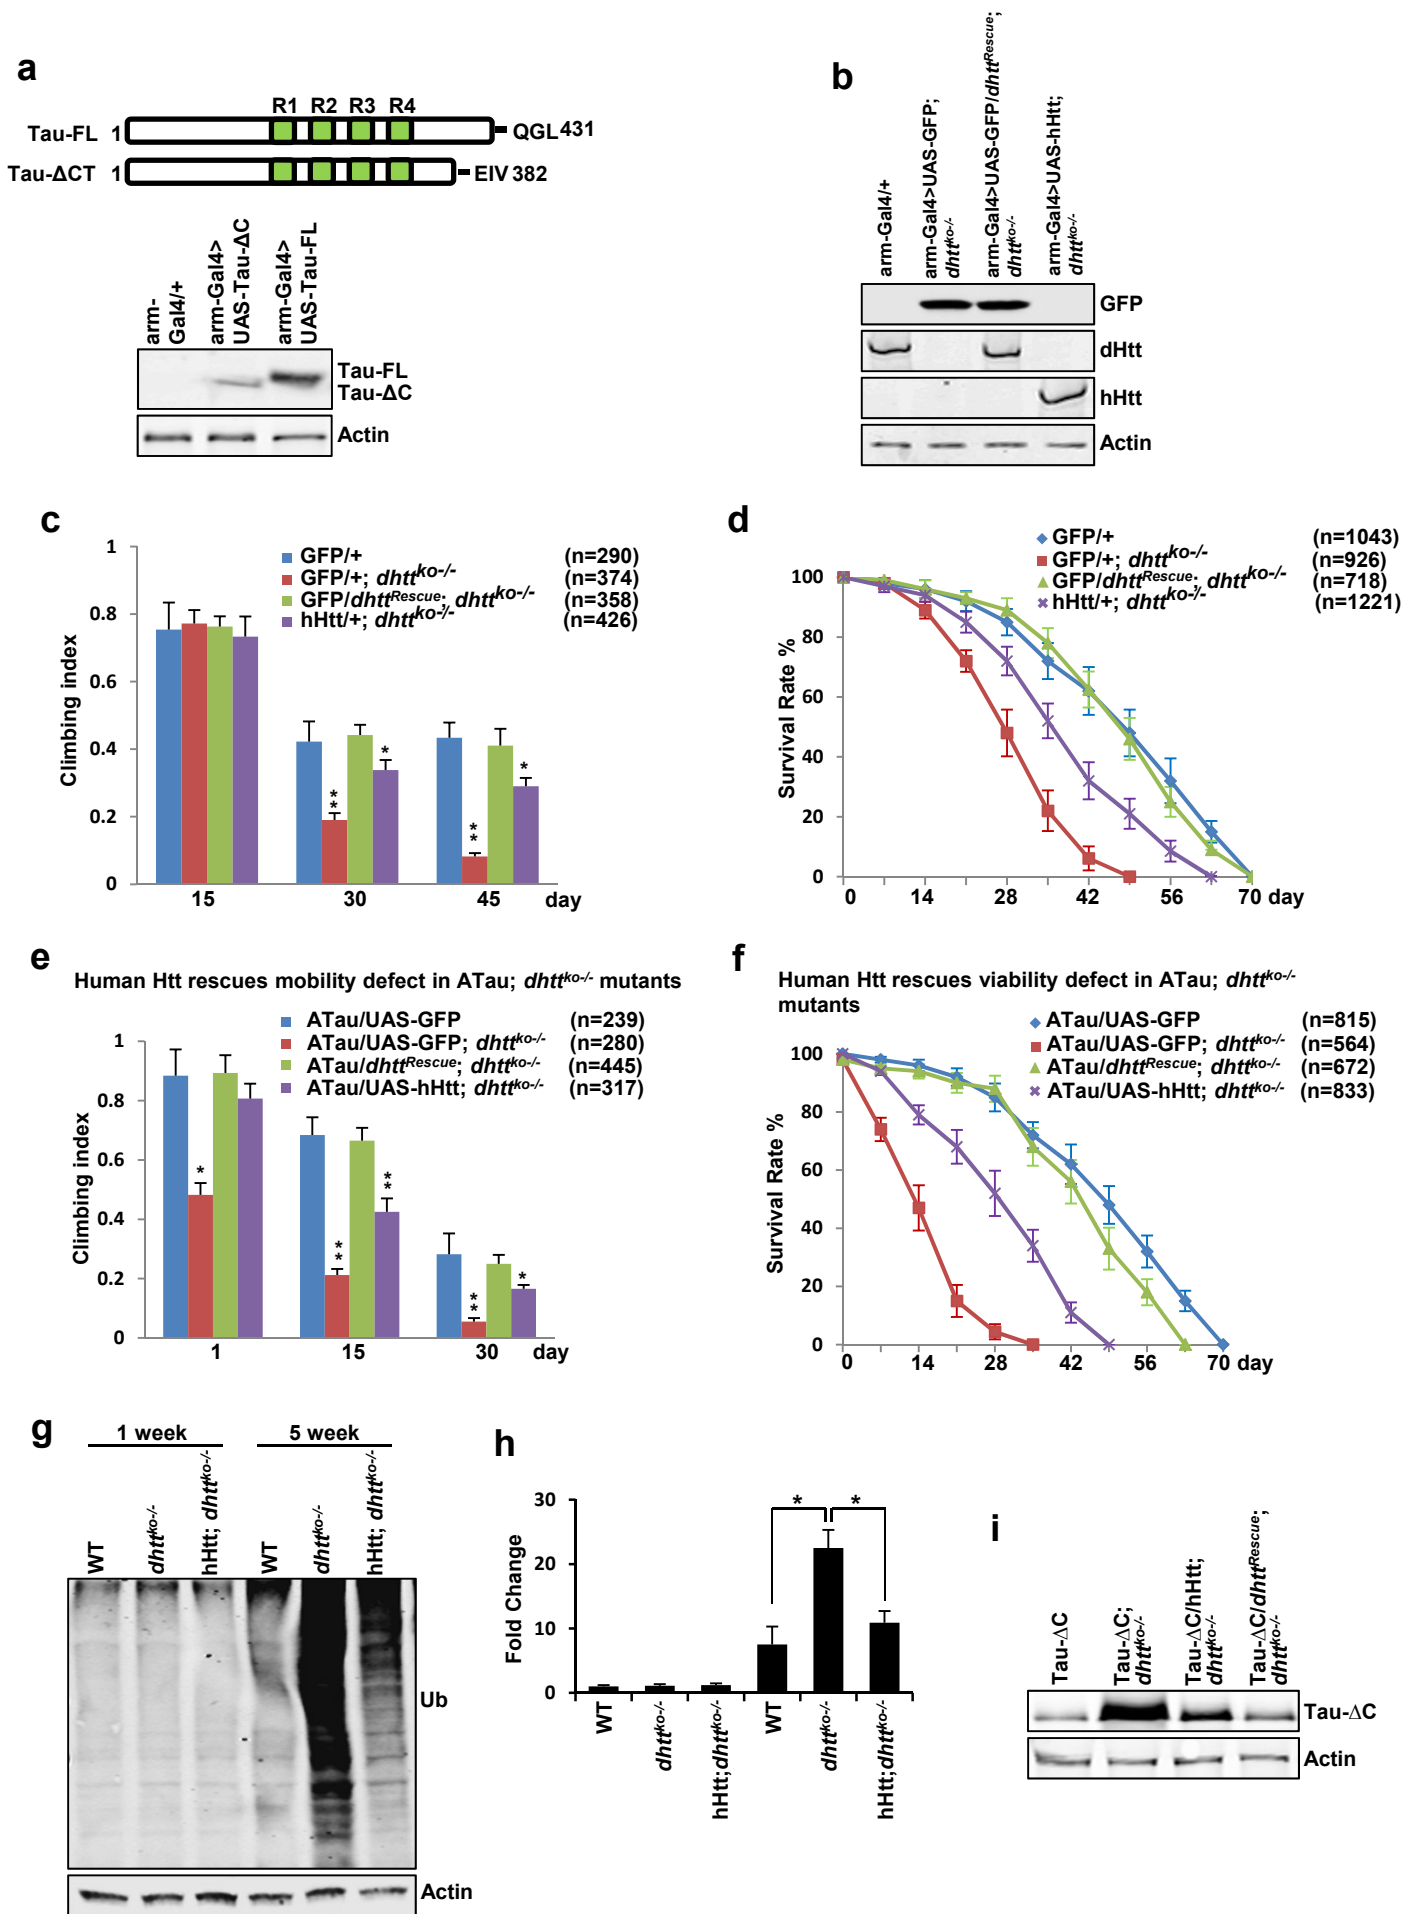

Supplementary Figure 3



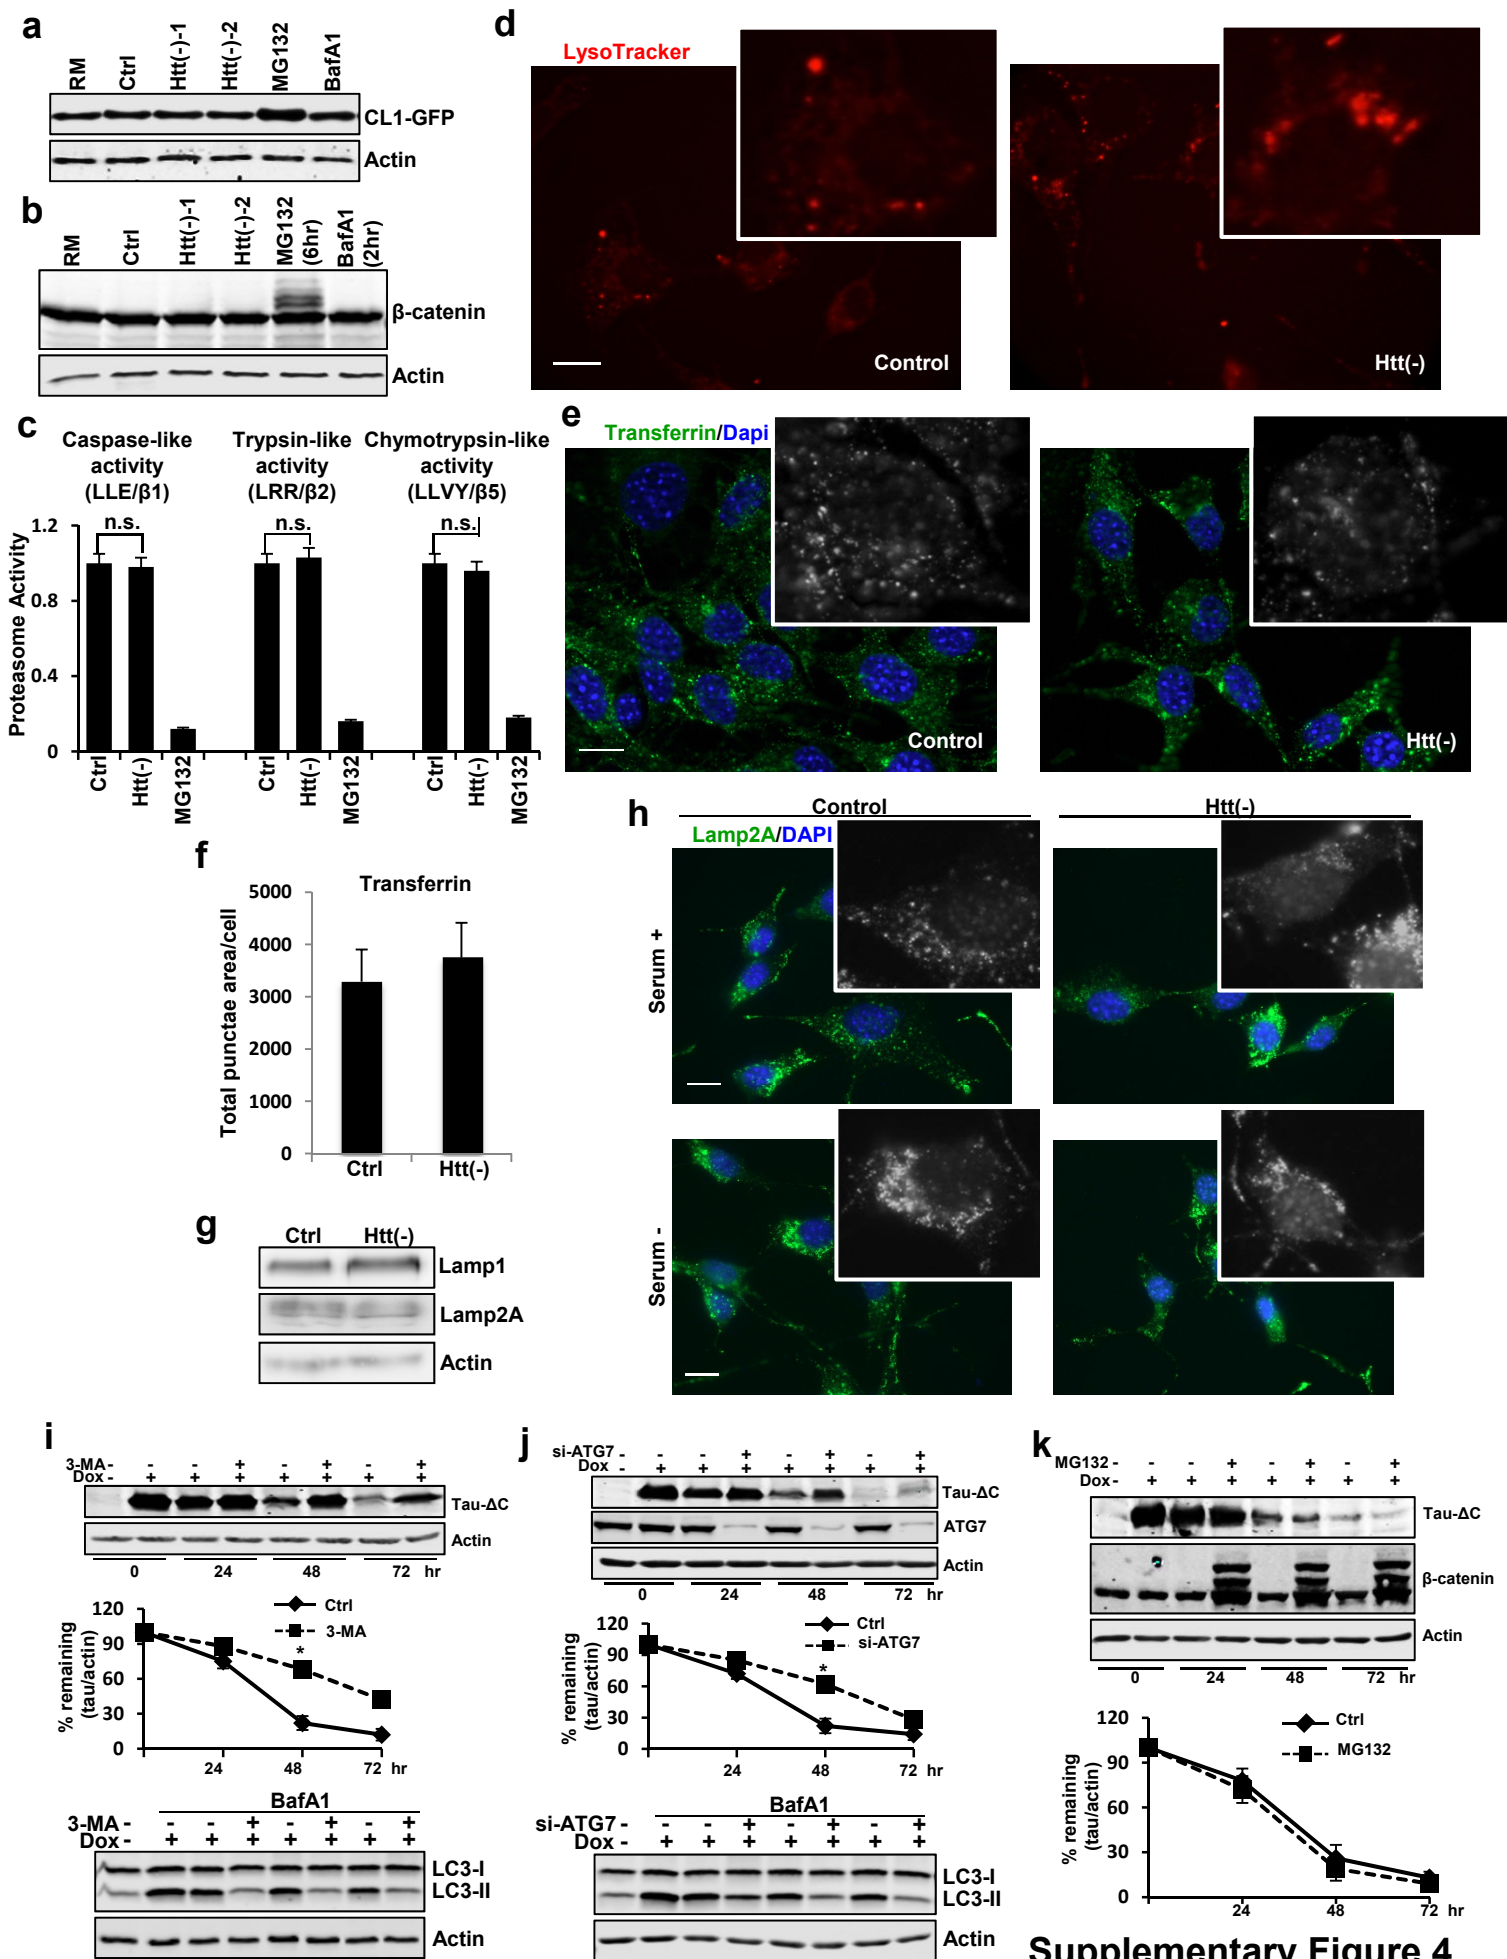

Supplementary Figure 4

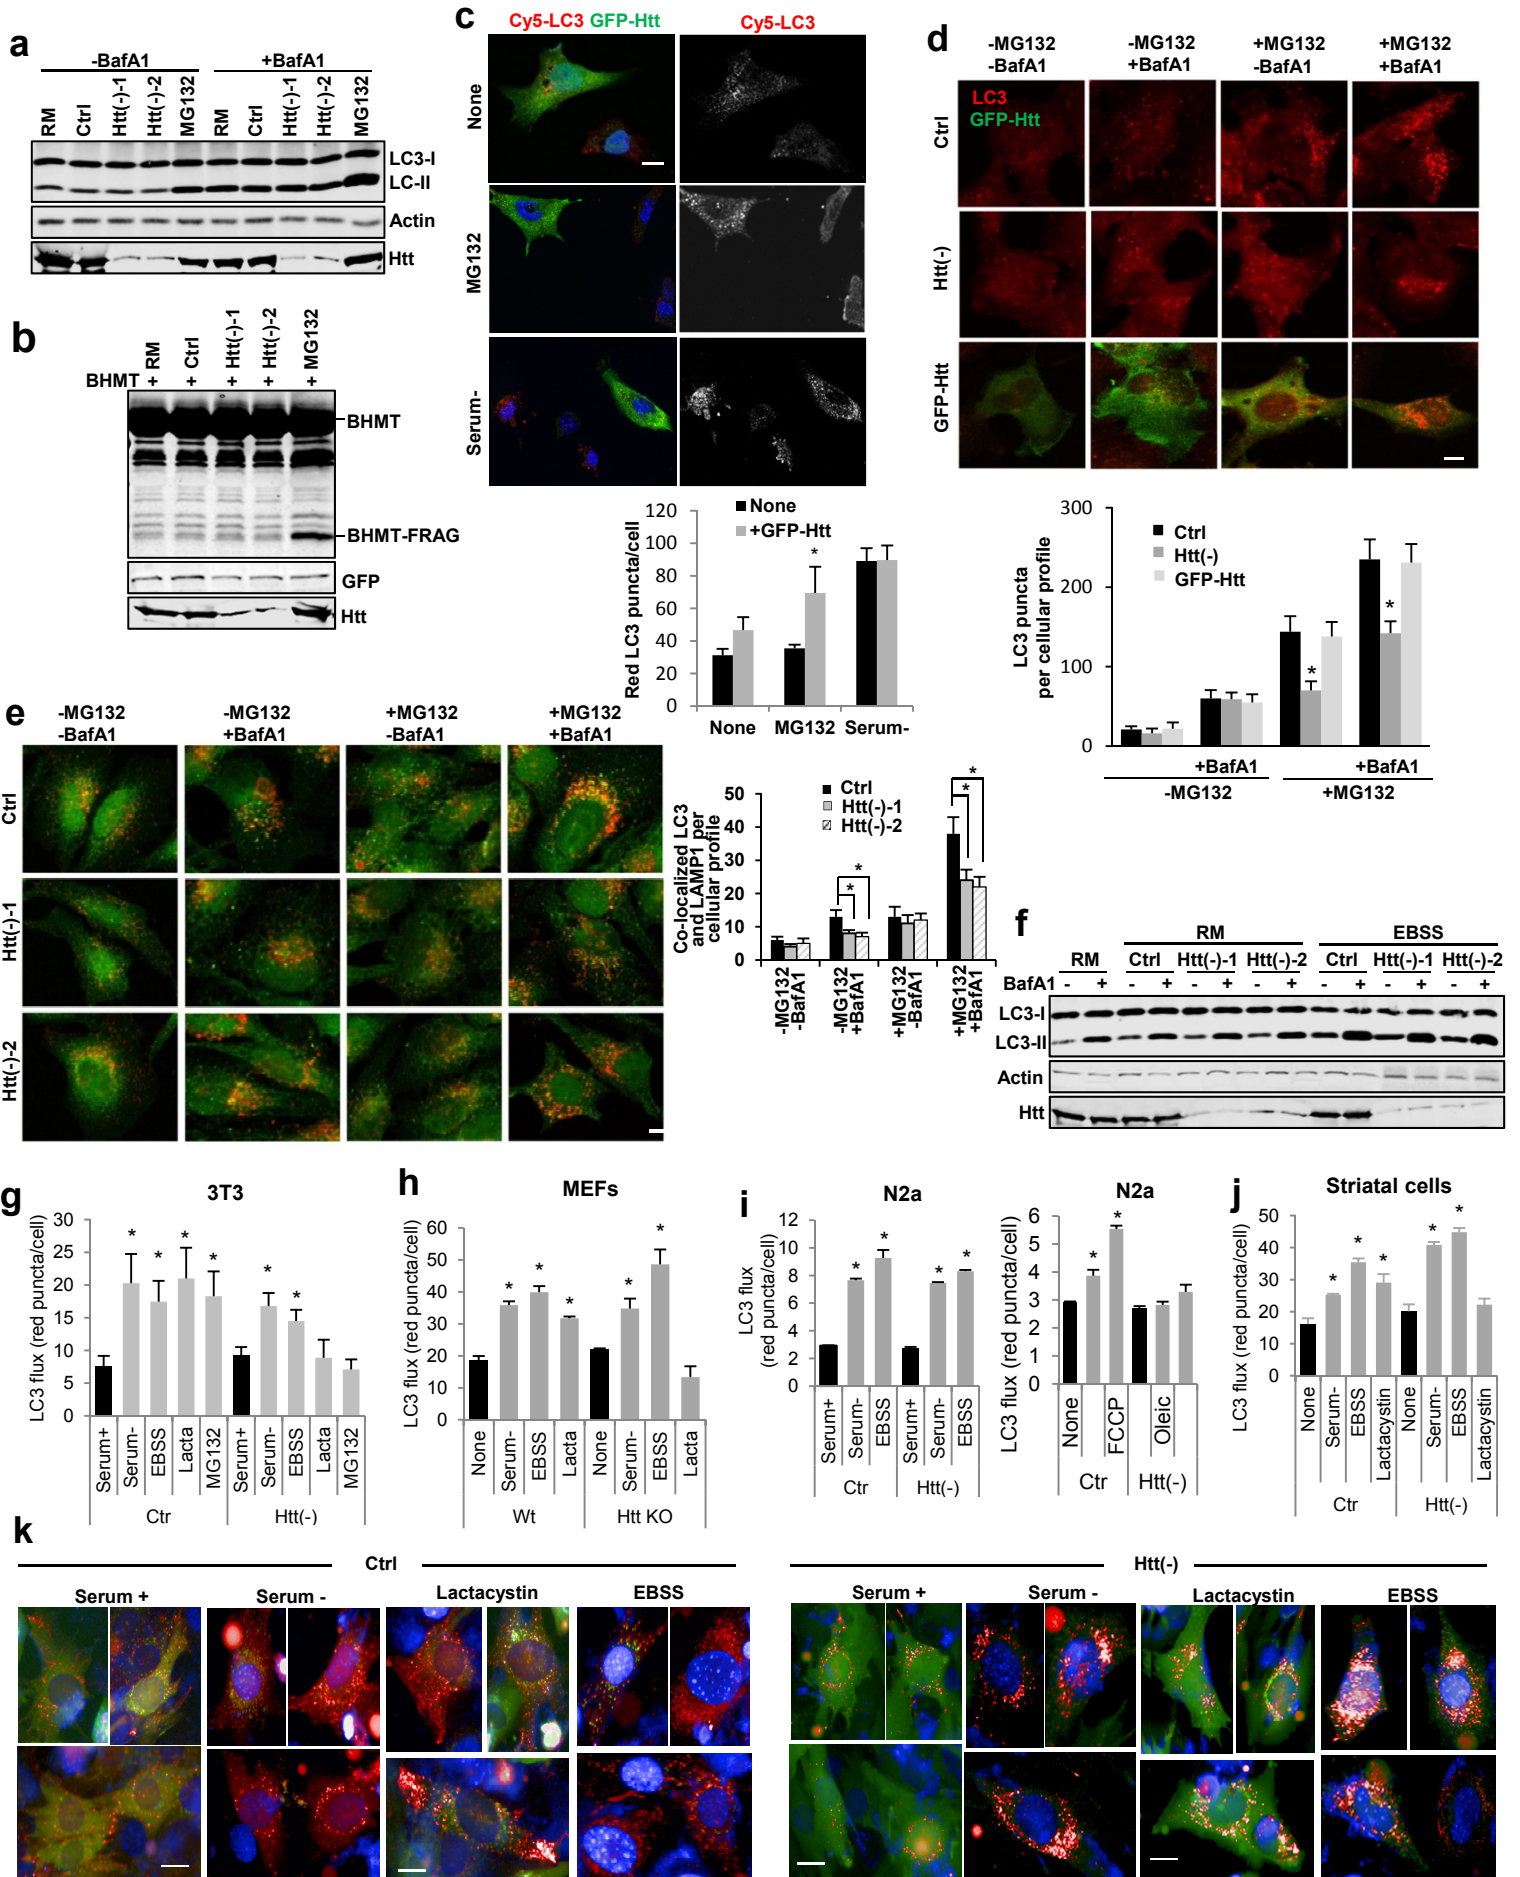

Supplementary Figure 5

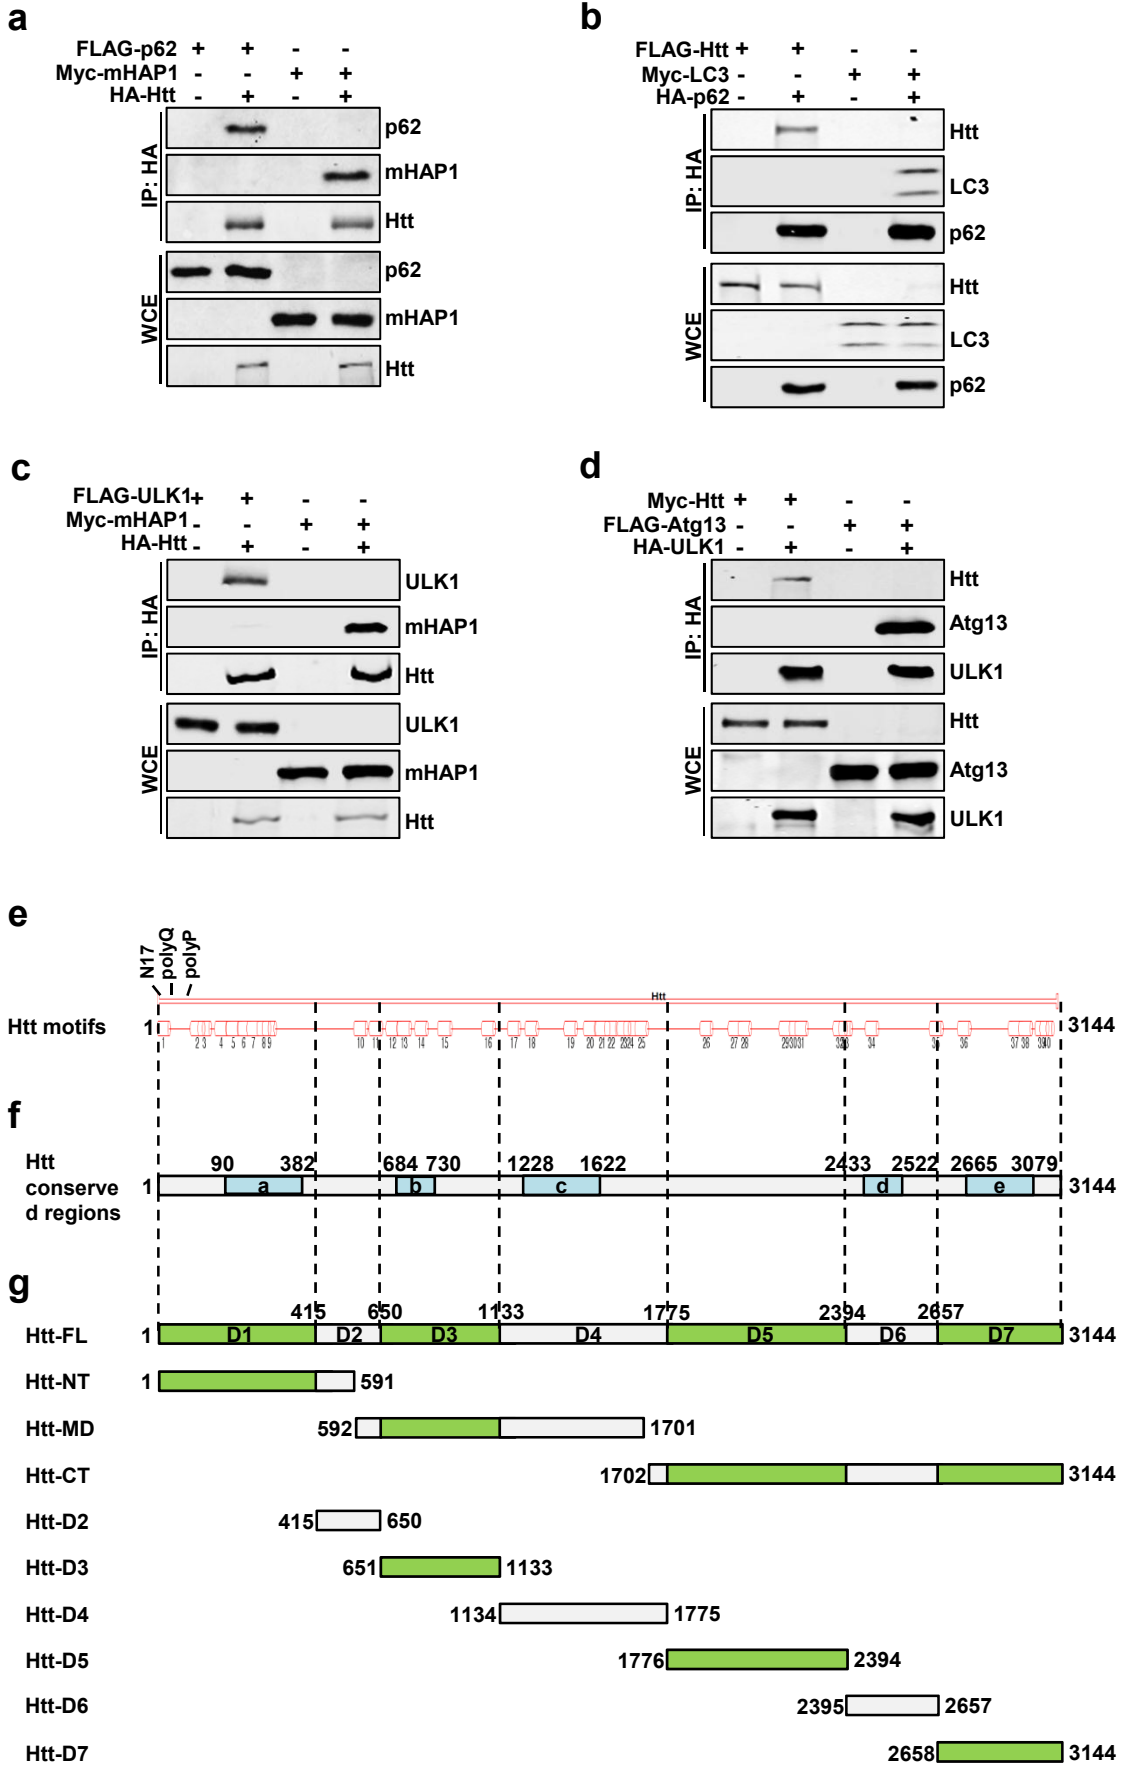

Supplementary Figure 6

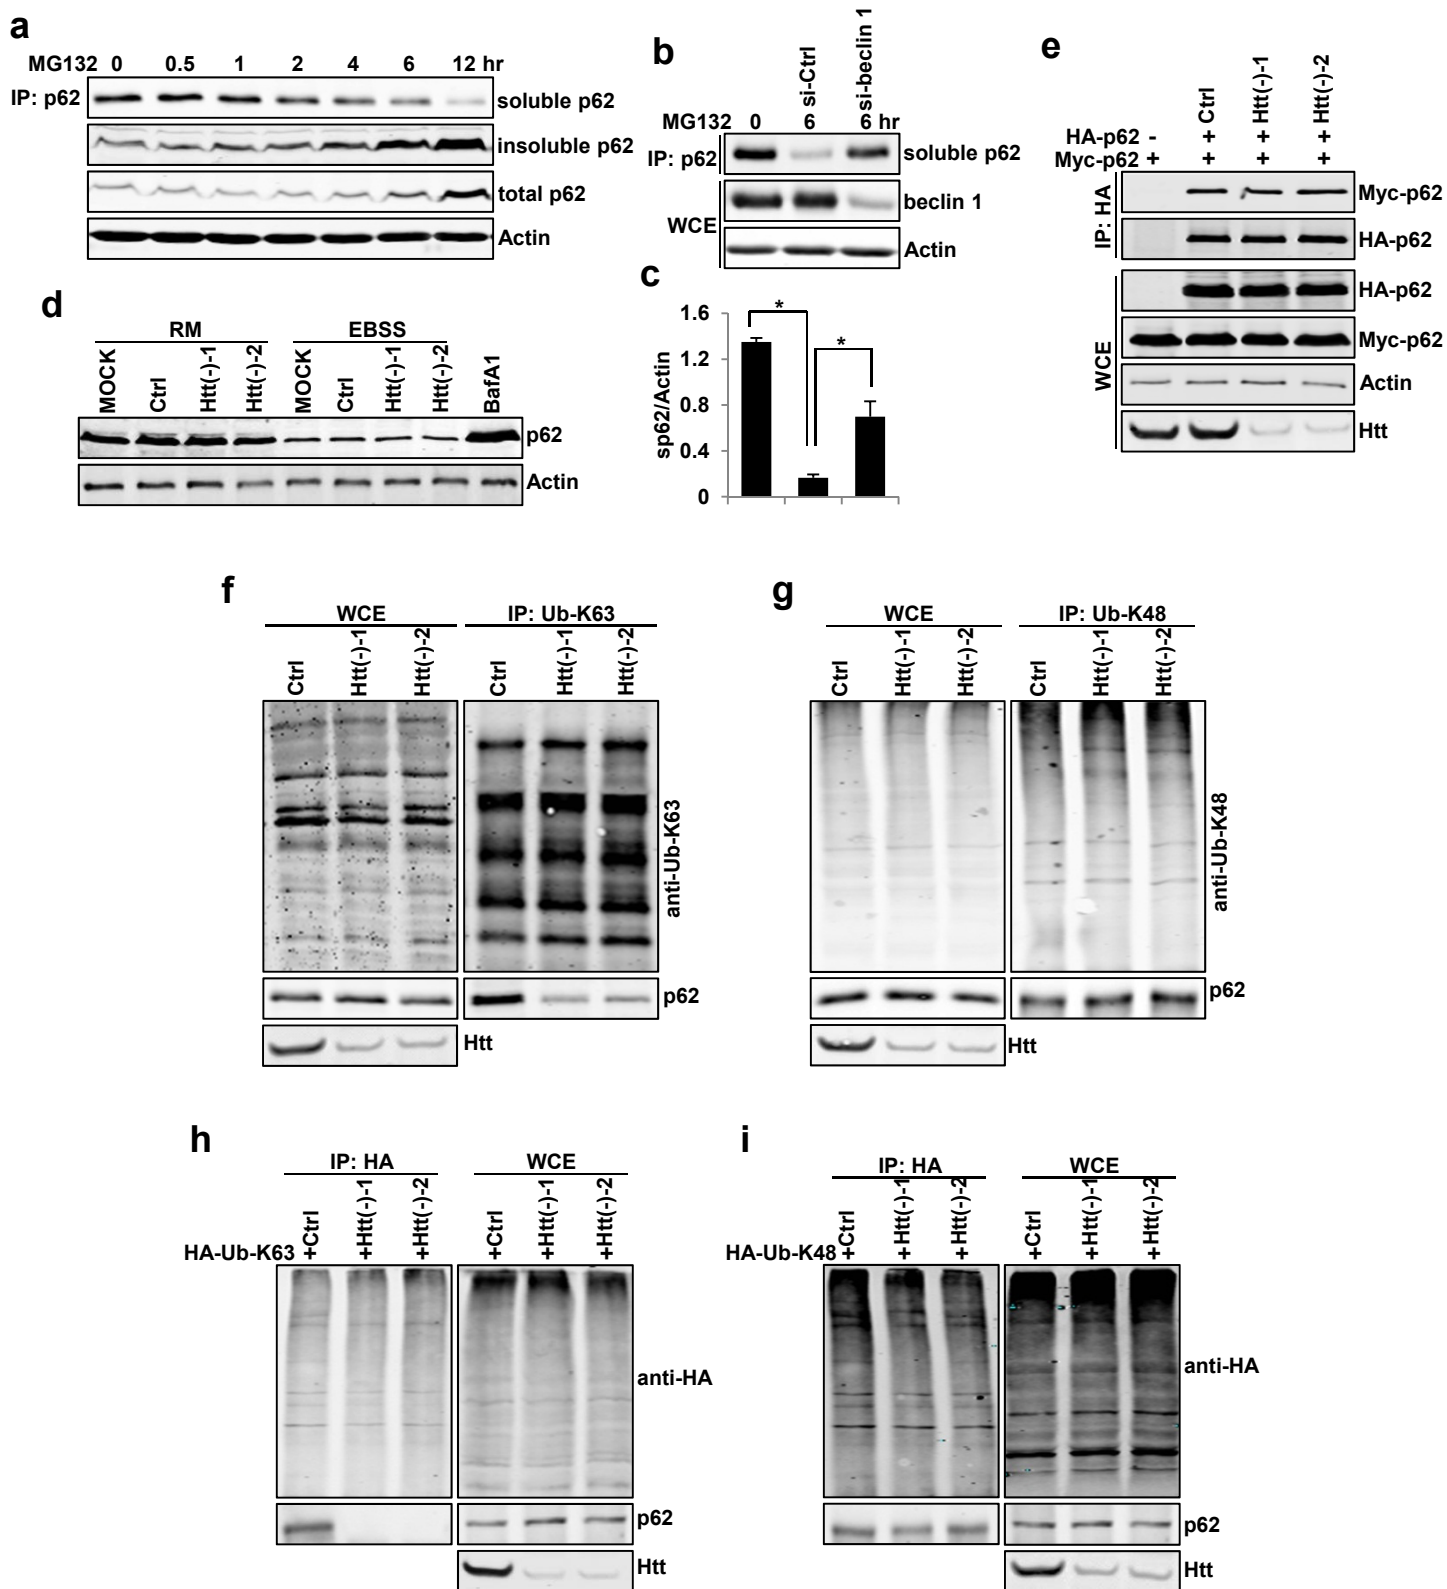

Supplementary Figure 7



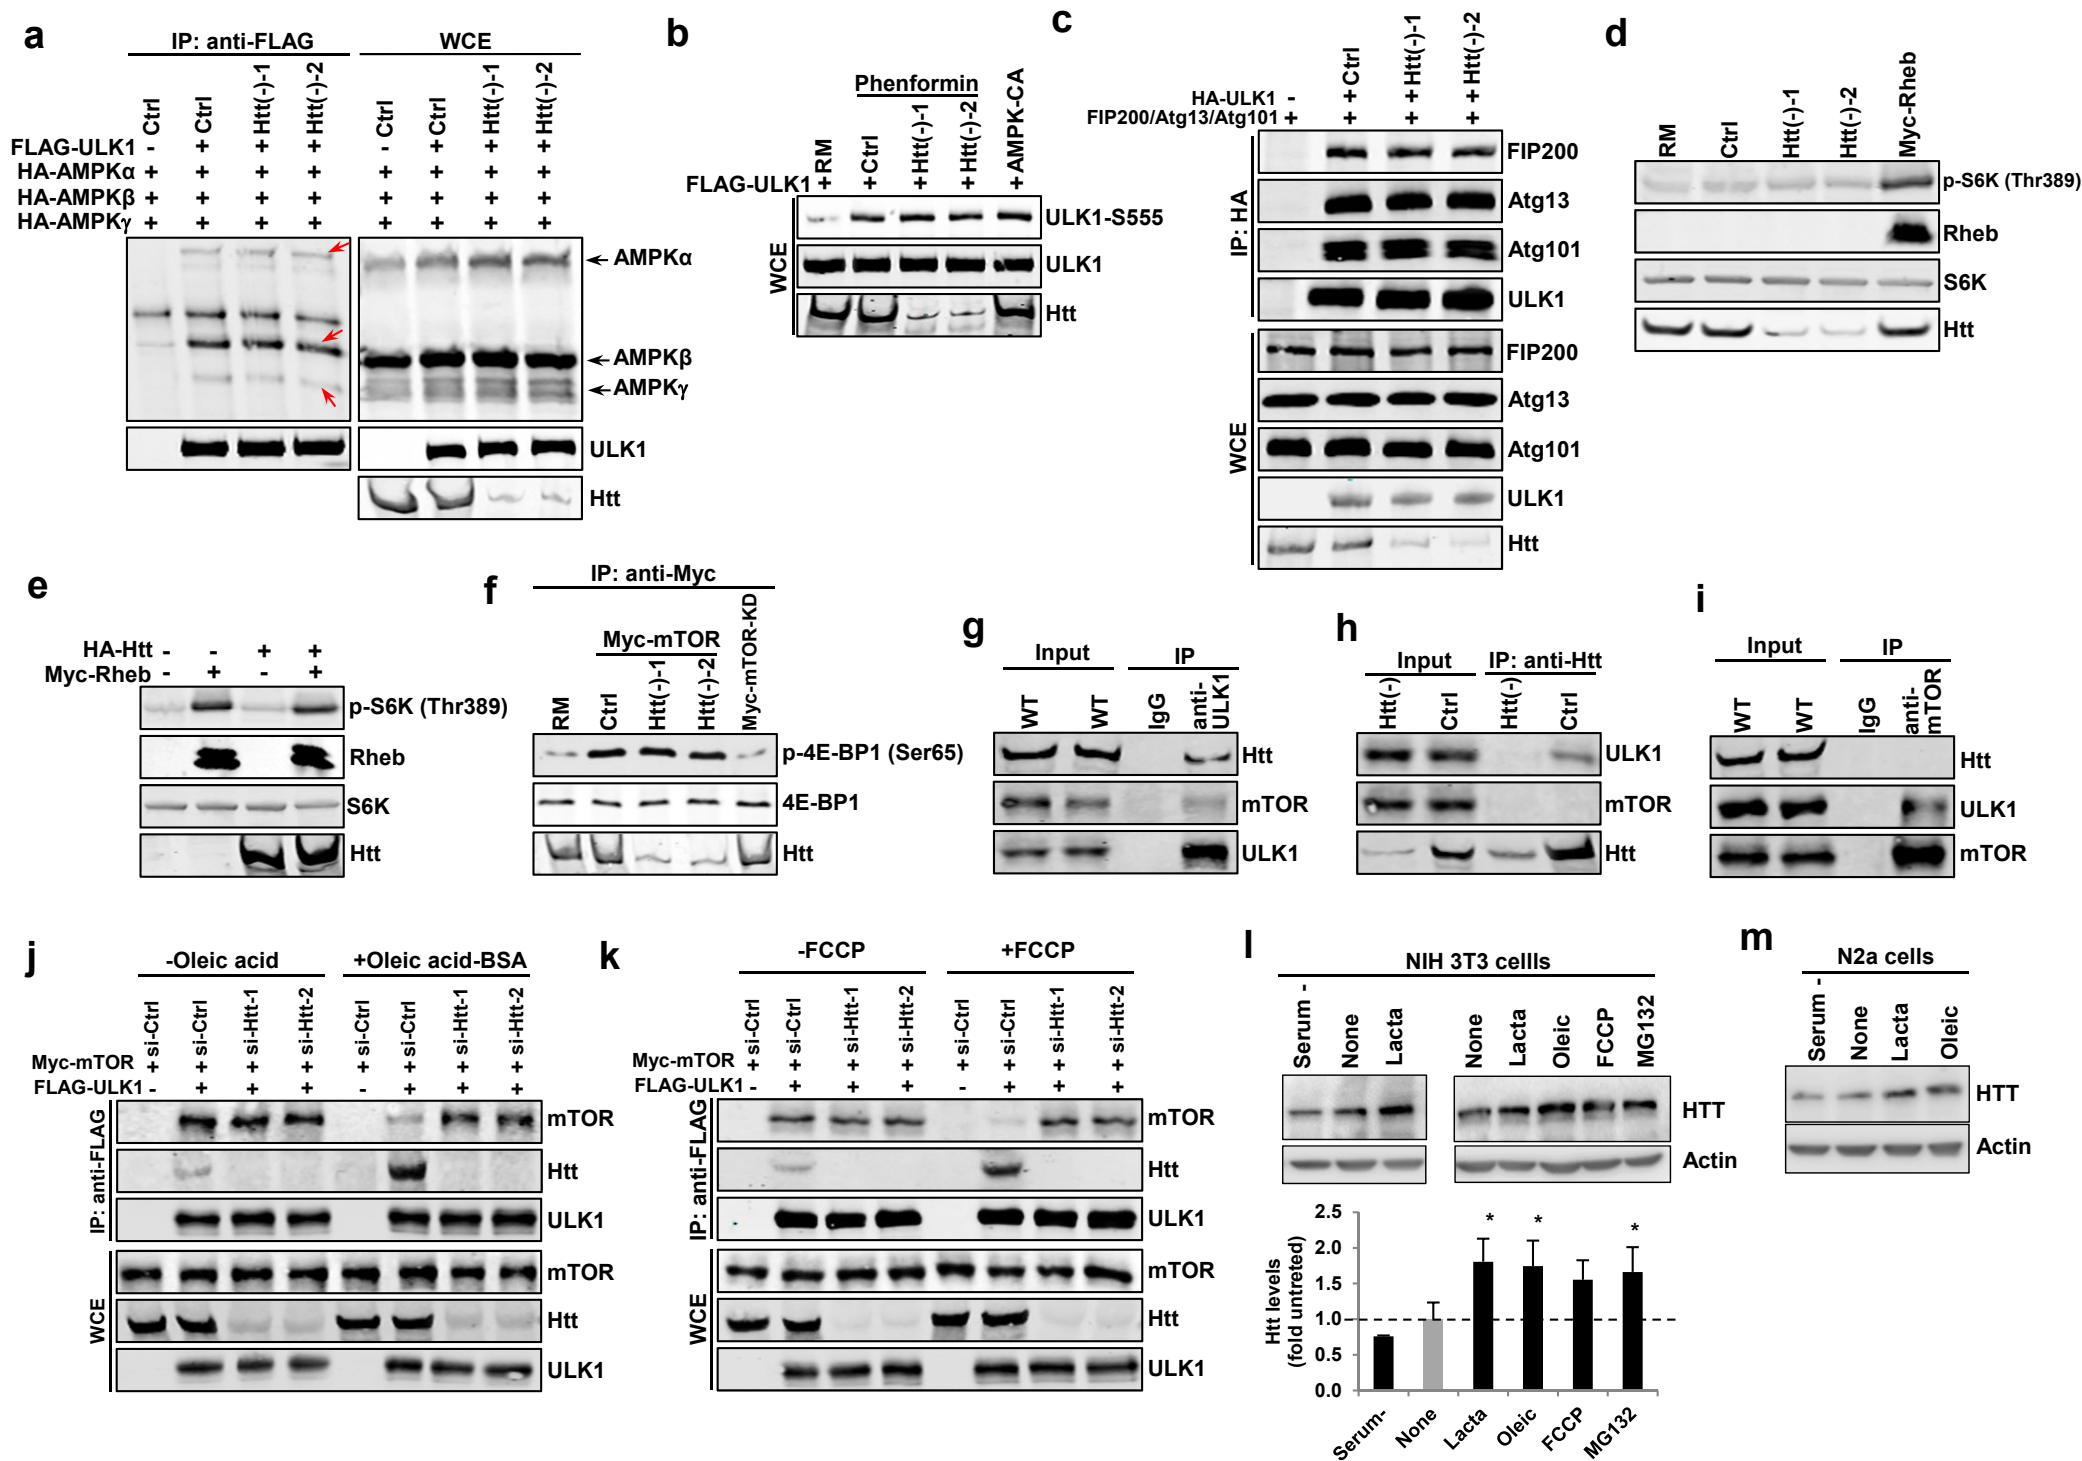

Supplementary Figure 8



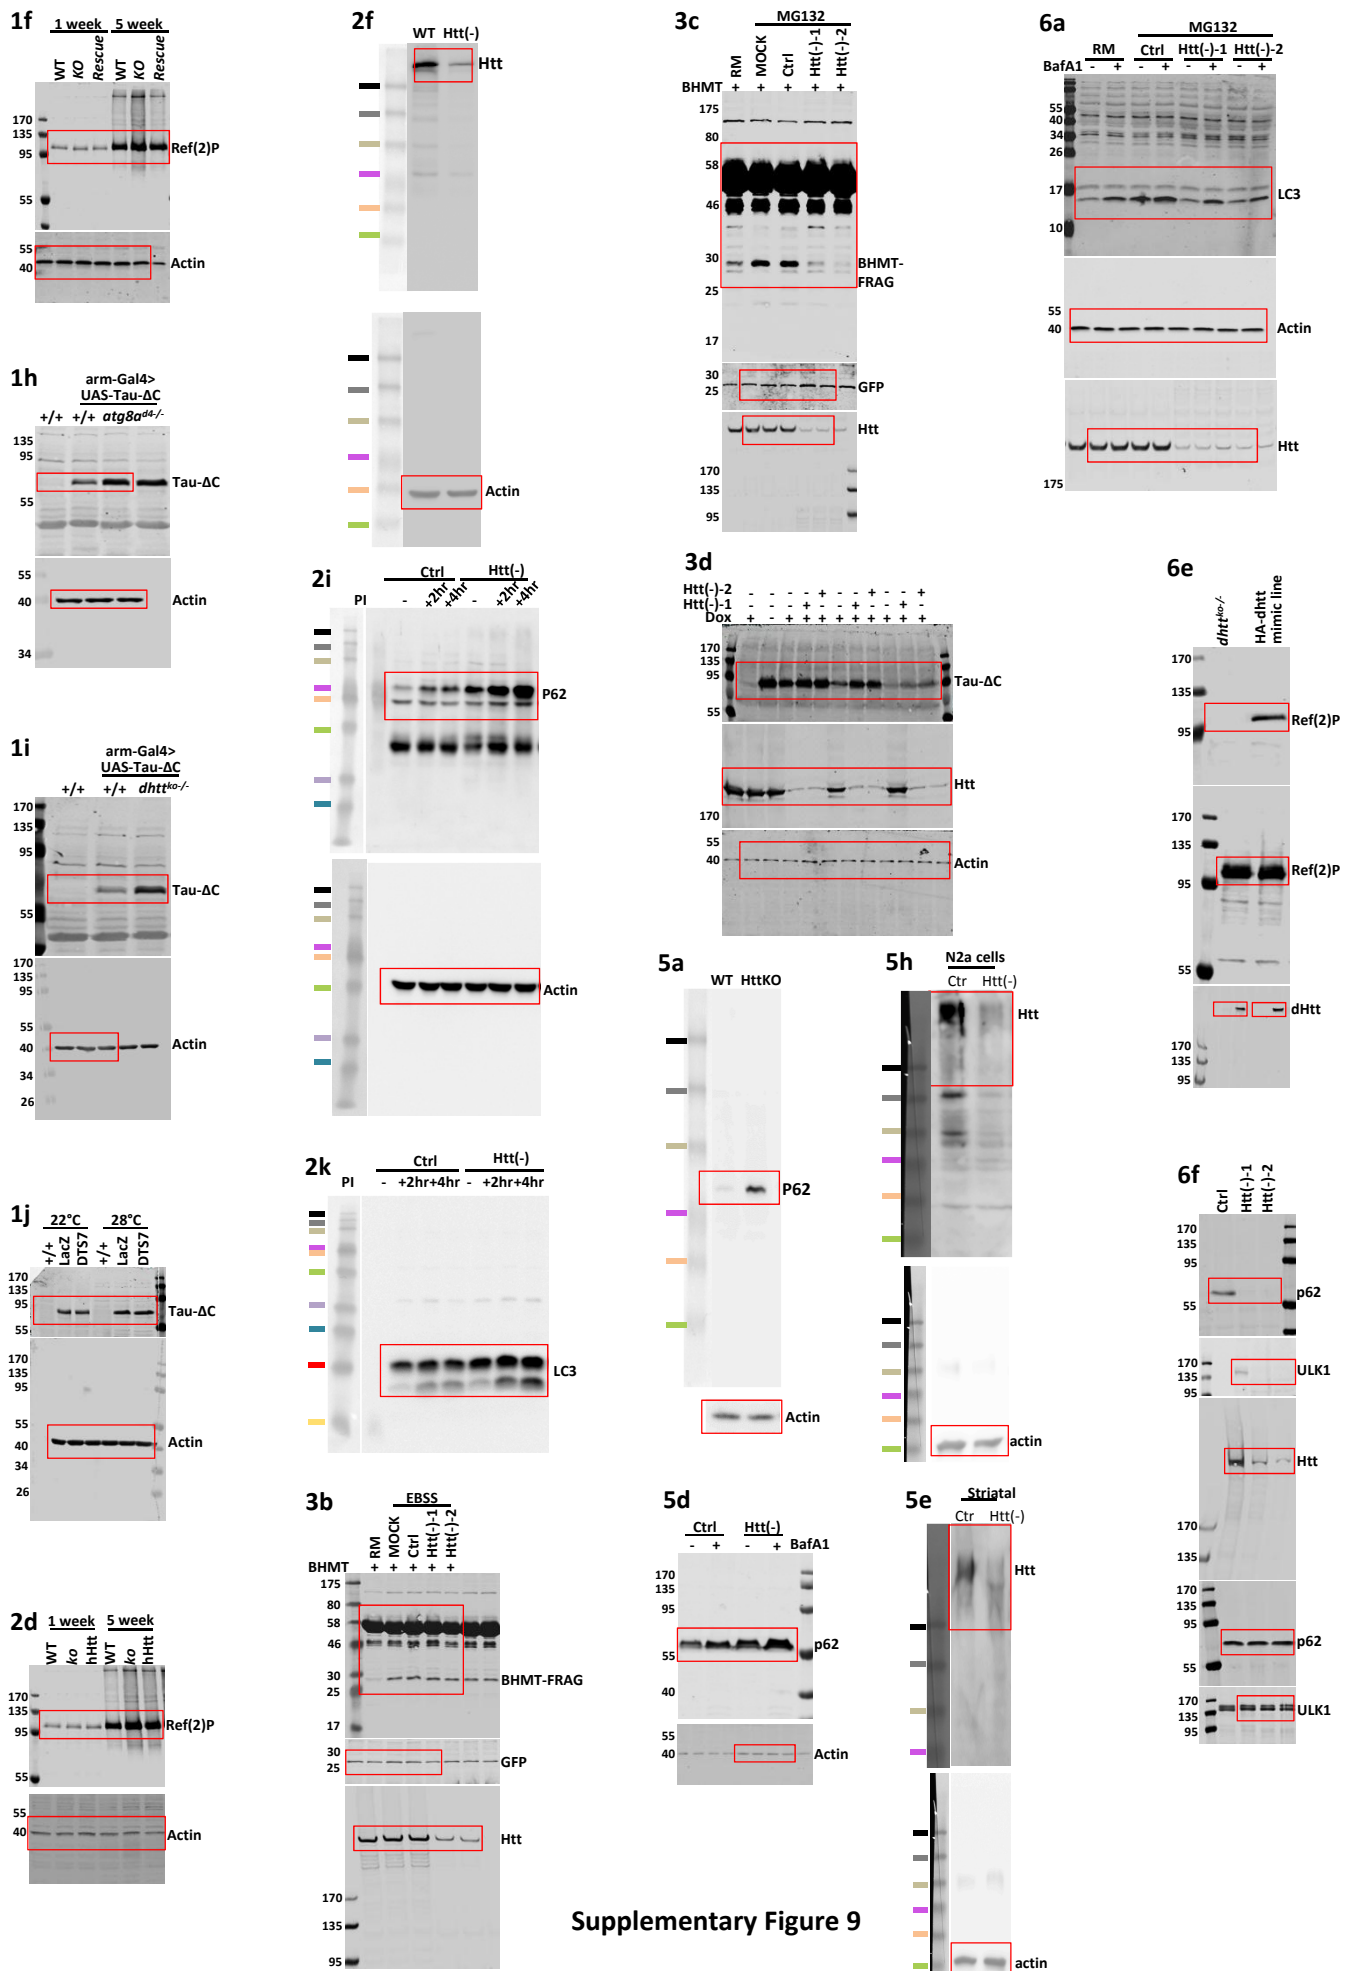

Supplementary Figure 9

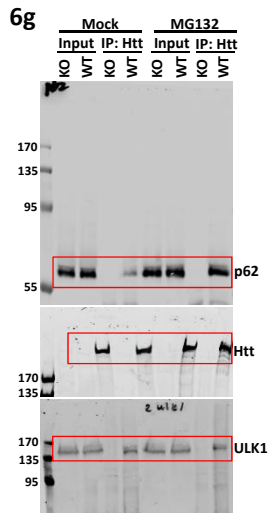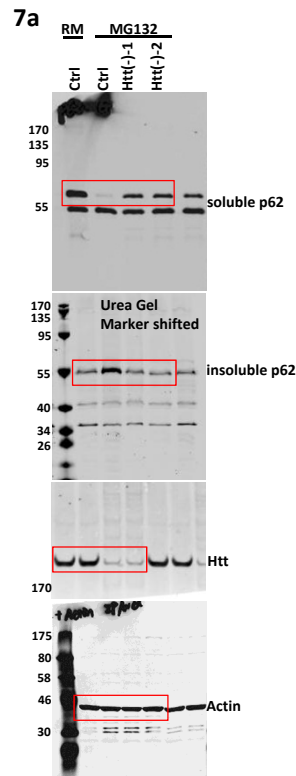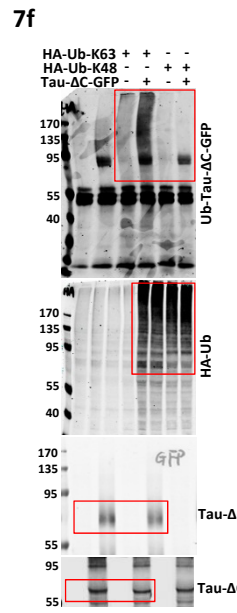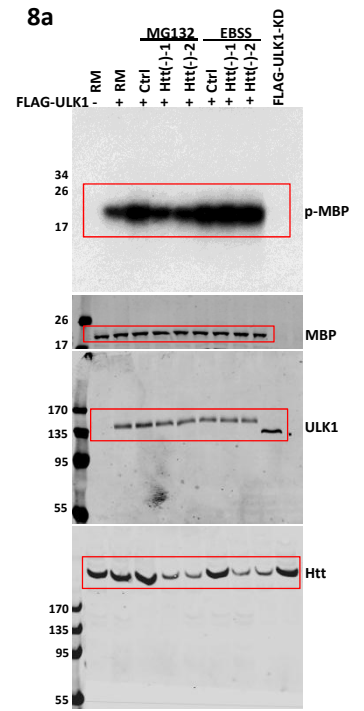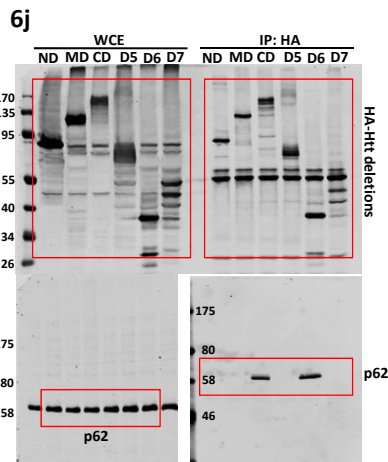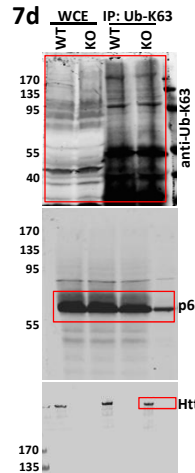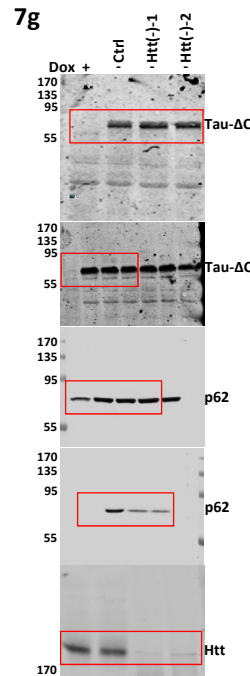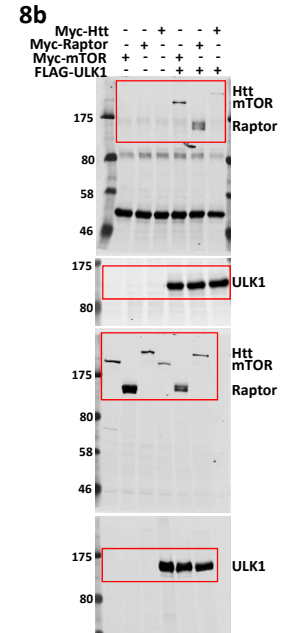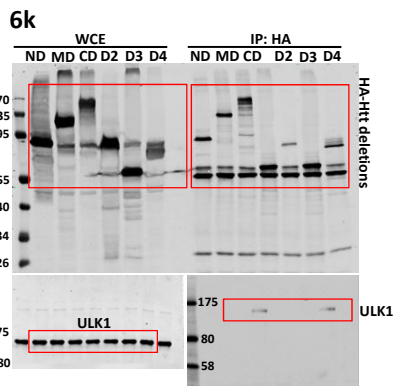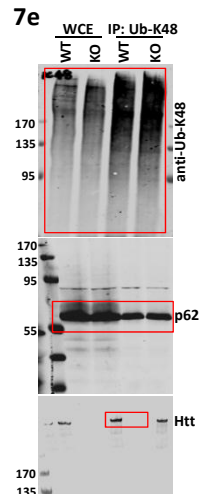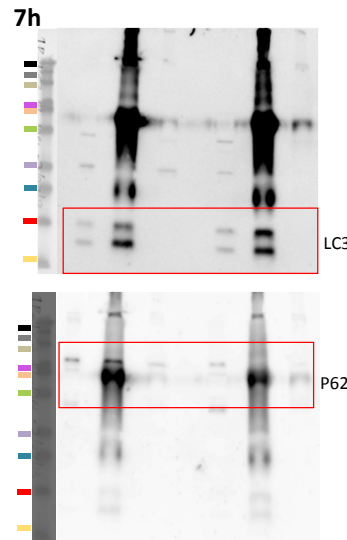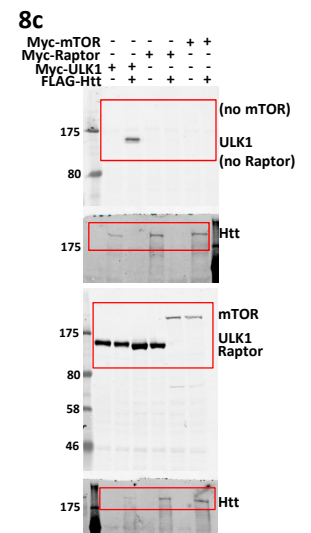

Supplementary Figure 9 (continued)

8d

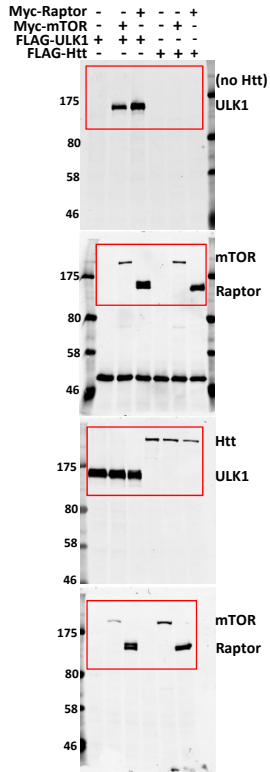

8e

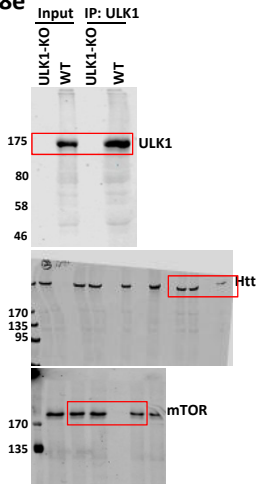

8f

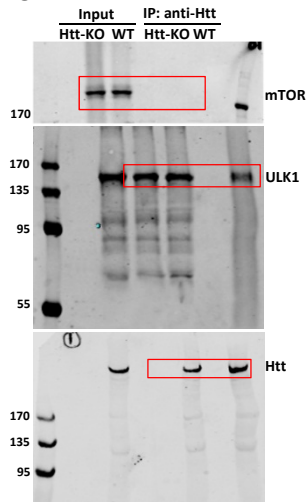

8i

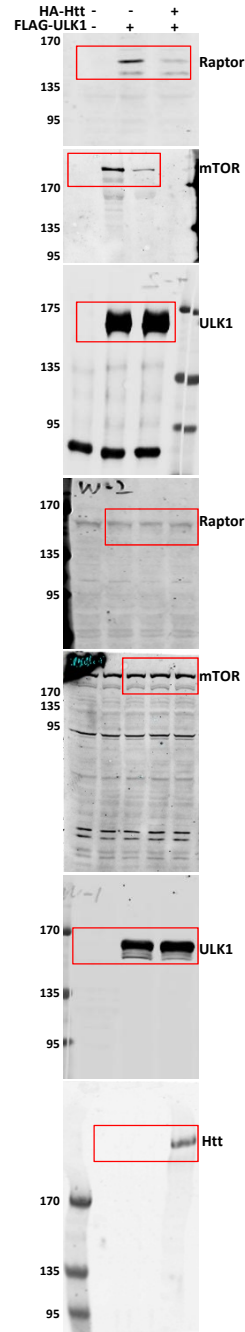

8g

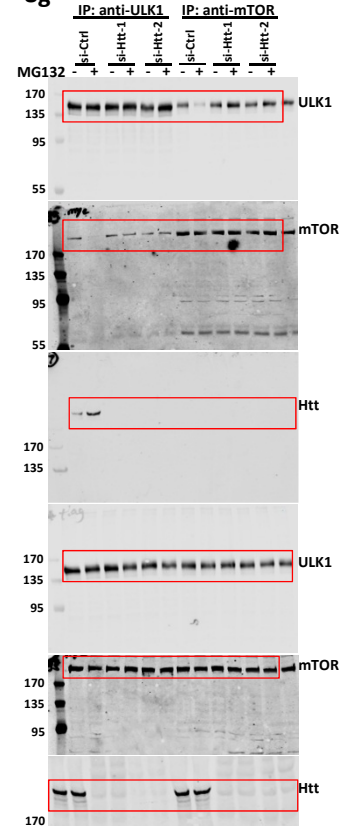

8h

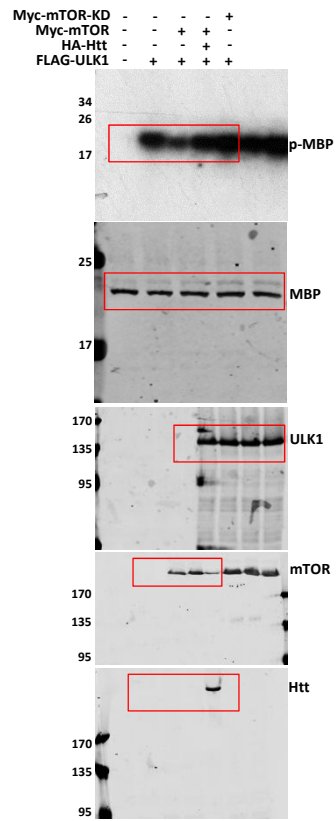

Supplementary Figure 9 (continued)
